# Supplementary material
Source: publisher figshare collection journal article supplement (https://acs.figshare.com/ndownloader/files/4586833)
Supplement: Supplementary file 1 [file 4586833]

# Supporting Information for the article titled “Biotin-avidin Binding Kinetics Measured by Single Molecule Imaging”

Joshua R. Wayment and Joel M. Harris\*

Department of Chemistry

University of Utah

315 South 1400 East

Salt Lake City, UT 84112-0850

**Contents:** This Supporting Information contains photobleaching kinetics measured for immobilized tetramethylrhodamine. In addition, the binding kinetics step for the neutravidine unbinding experiment is shown, together with a fit to determine the binding rate constant.

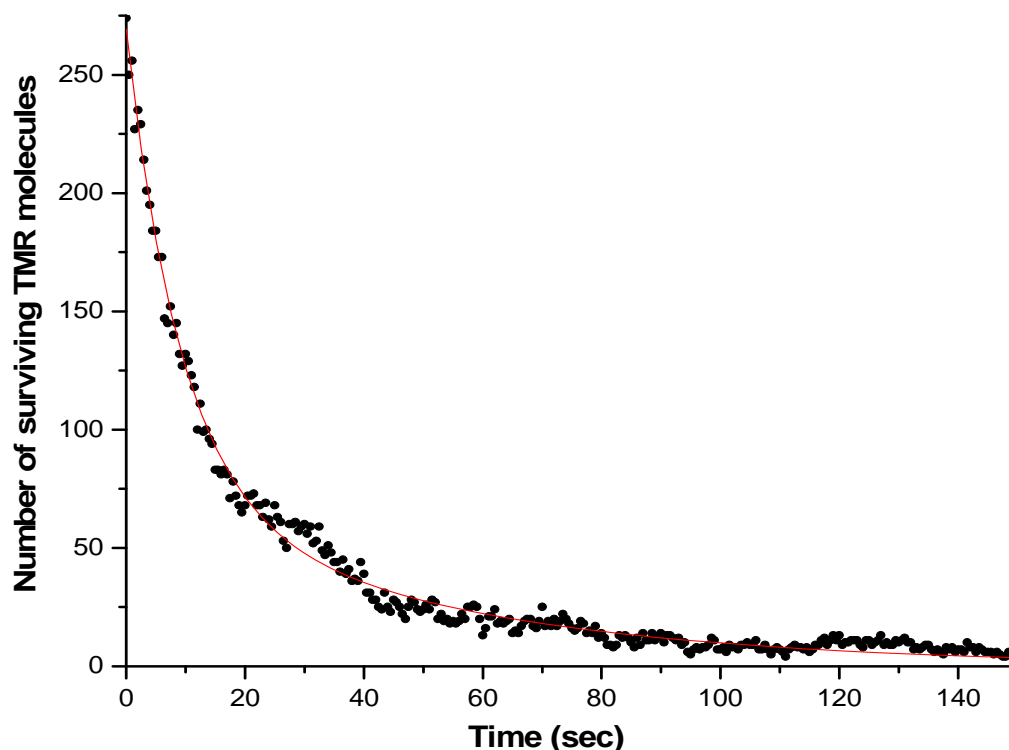

**Figure 1. Photobleaching kinetics of immobilized tetramethylrhodamine.** The rate of photobleaching of tetramethylrhodamine is measured by counting single molecules immobilized as TMR-succinimidyl ester onto propylamine-silane sites on a cyanoethylsilane surface. Under continuous illumination conditions at the same average power used for imaging TMR-labeled neutravidin, the photobleaching kinetics of tetramethylrhodamine were biexponential with a shorter-lived population,  $\tau_1 = 9.2 (\pm 0.3)$  s, and a longer-lived population,  $\tau_2 = 50 (\pm 2)$  s. The population-weighted average photobleaching lifetime is  $\tau_{pb} = 20.3$  s.

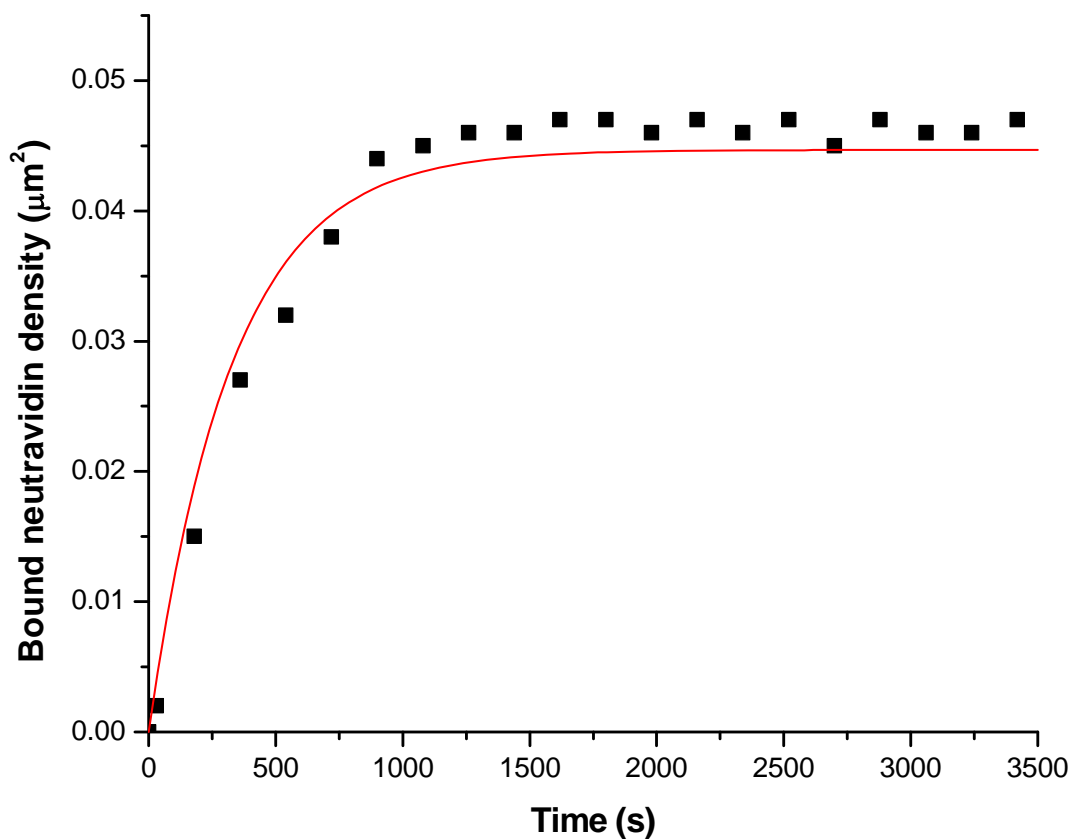

**Figure 2.** The neutravidin accumulation kinetics monitored prior to the unbinding kinetics experiment shown in Figure 5. The neutravidin solution concentration was 13.3 pM, matching the conditions of the top curve in Figure 4. The data are fit to Equation 1, and the binding rate constant is  $k_{bind} = 2.0 (\pm 0.2) \times 10^8 \text{ M}^{-1} \text{ s}^{-1}$ , consistent with the results found in Figures 4 and 6.
